# Supplementary material
Source: MDPI journal article supplement (https://www.mdpi.com/2410-3888/9/5/184)
Supplement: s1 [file s1]

**Table S1 The Product Numbers of Commercial Assay kits.**

| Enzyme                                                     | Kit No.            | Manufacturer                               |
|------------------------------------------------------------|--------------------|--------------------------------------------|
| Amylase (AMS)                                              | C016-1-1, C016-2-1 | Nanjing Jiancheng Bioengineering Institute |
| Glucose-6-phosphate dehydrogenase (G-6-PD)                 | A027-1-1           | Nanjing Jiancheng Bioengineering Institute |
| Malic enzyme (ME)                                          | BC1125             | Solarbio Life Sciences                     |
| pyruvate kinase (PK)                                       | A076-1-1           | Nanjing Jiancheng Bioengineering Institute |
| Acyl-CoA oxidase (ACO)                                     | H232               | Nanjing Jiancheng Bioengineering Institute |
| Lipase (LPS)                                               | E1019              | Applygen Technologies Inc.                 |
| Fatty acid synthase (FAS)                                  | H231               | Nanjing Jiancheng Bioengineering Institute |
| Carnitine-acylcarnitine translocase (CACT)                 | SEB657Ra           | Wuhan Cloud-Clone Corp.                    |
| Acetyl-CoA carboxylase (ACC)                               | H232               | Nanjing Jiancheng Bioengineering Institute |
| Superoxide dismutase (SOD)                                 | A001-3-1           | Nanjing Jiancheng Bioengineering Institute |
| Phospholipid hydroperoxide glutathione peroxidase (GSH-PX) | A005-1-1           | Nanjing Jiancheng Bioengineering Institute |
| Catalase (CAT)                                             | A007-1-1           | Nanjing Jiancheng Bioengineering Institute |
| Lipoprotein lipase (LPL)                                   | A067-1-1           | Nanjing Jiancheng Bioengineering Institute |
| malondialdehyde (MDA)                                      | A003-1-1           | Nanjing Jiancheng Bioengineering Institute |

**Table S2 Primers Used for Detection of DEGs**

| Gene            | Primer name       | Primer sequence (5' -3')  | Purpose        | Amplification efficiency (%) | Correlation coefficient |
|-----------------|-------------------|---------------------------|----------------|------------------------------|-------------------------|
| <i>ghrb</i>     | <i>ghrb F</i>     | AGCAACCCCATATCCCCTCT      | RT-qPCR        | 95.30                        | 0.998                   |
|                 | <i>ghrb R</i>     | AGAGGTAGTGGCAGGACAGG      | RT-qPCR        |                              |                         |
| <i>igfbp4</i>   | <i>igfbp4 F</i>   | AGCAATATCCGGTGCAGTCC      | RT-qPCR        | 101.35                       | 0.995                   |
|                 | <i>igfbp4 R</i>   | AGCAATATCCGGTGCAGTCC      | RT-qPCR        |                              |                         |
| <i>vtgB</i>     | <i>vtgB F</i>     | CTGGTATGGCAGGTTGCTGA      | RT-qPCR        | 100.08                       | 0.998                   |
|                 | <i>vtgB R</i>     | CTCAACCTGGAAATCCAGAAAAC   | RT-qPCR        |                              |                         |
| <i>apoF</i>     | <i>apoF F</i>     | AGTTCCTGCACTTTCCAGCA      | RT-qPCR        | 96.84                        | 0.998                   |
|                 | <i>apoF R</i>     | GTCCTGTGATTTTGTAGTTTCAGCA | RT-qPCR        |                              |                         |
| <i>apoB-100</i> | <i>apoB-100 F</i> | TCTATTTGGGAAGCAGCTCTGA    | RT-qPCR        | 94.92                        | 0.997                   |
|                 | <i>apoB-100 R</i> | GGAATGTTAGGAAGGAAGGCA     | RT-qPCR        |                              |                         |
| <i>apoE</i>     | <i>apoE F</i>     | GCAGGGTGAAAGTGCATCGTT     | RT-qPCR        | 103.53                       | 0.996                   |
|                 | <i>apoE R</i>     | AGGTTGACTATGCAGAAGGTTGA   | RT-qPCR        |                              |                         |
| <i>apoEb</i>    | <i>apoEb F</i>    | ATGAGGACACGTTTCGACCC      | RT-qPCR        | 101.77                       | 0.993                   |
|                 | <i>apoEb R</i>    | TCAGGGTGGTGATCTTTGCC      | RT-qPCR        |                              |                         |
| <i>ggct</i>     | <i>ggct F</i>     | AGACTCACCCCTTCCTGGTT      | RT-qPCR        | 99.25                        | 0.999                   |
|                 | <i>ggct R</i>     | CAACTGGCAAATCCTTCGGC      | RT-qPCR        |                              |                         |
| <i>gpx1a</i>    | <i>gpx1a F</i>    | TGCATCAGAAACTCCCCTCAC     | RT-qPCR        | 98.84                        | 0.998                   |
|                 | <i>gpx1a R</i>    | ATGGCTGTTGGAGAGATAGCC     | RT-qPCR        |                              |                         |
| <i>gstt3</i>    | <i>gstt3 F</i>    | GAAGGAACACGGGGGAAGTG      | RT-qPCR        | 94.54                        | 0.992                   |
|                 | <i>gstt3 R</i>    | CTCAAAGGGAATCCCGACCG      | RT-qPCR        |                              |                         |
| $\beta$ -actin  | $\beta$ -actin F  | GCAGGAGTACGATGAGTCCG      | Reference gene | 99.25                        | 0.998                   |
|                 | $\beta$ -actin R  | AGGCATGTATGCAGAGCCAG      | Reference gene |                              |                         |

**Table S3 Assembly results statistics**

| Length Range | Transcript     | Unigene       |
|--------------|----------------|---------------|
| 200-300      | 9,934(16.75%)  | 8,600(23.57%) |
| 300-500      | 9,177(15.48%)  | 6,677(18.30%) |
| 500-1000     | 12,006(20.25%) | 6,866(18.82%) |
| 1000-2000    | 14,881(25.09%) | 7,460(20.45%) |
| 2000+        | 13,303(22.43%) | 6,879(18.86%) |

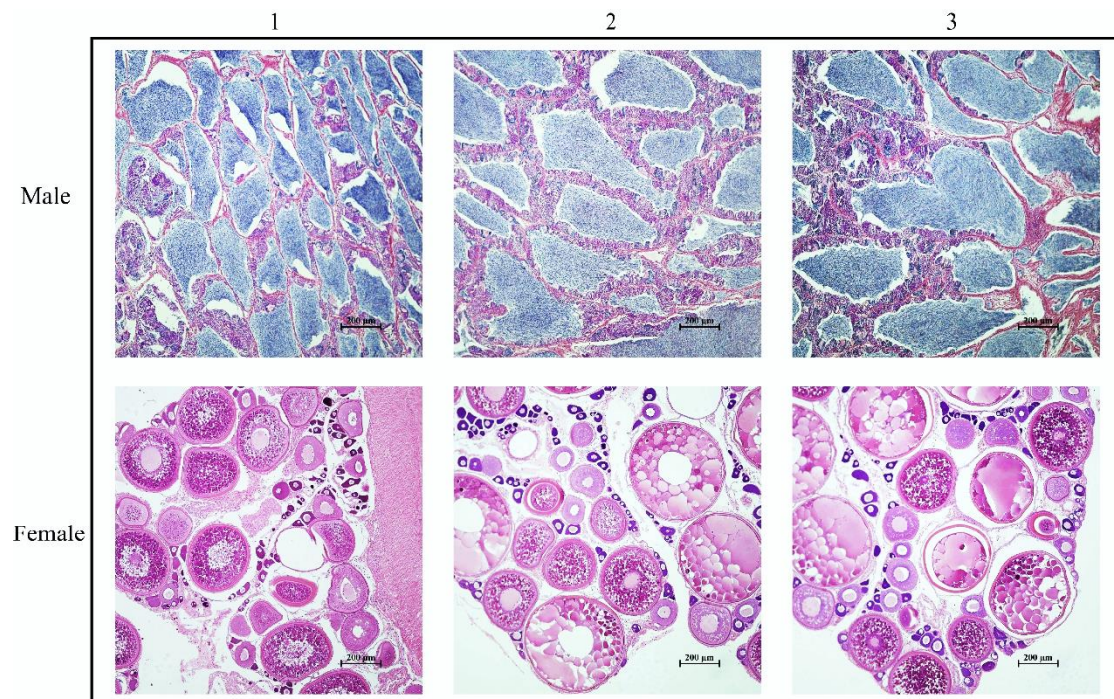

**Figure S1: Histological identification of male and female yellowfin tuna gonads. Scale bar: 200 µm.**
